# Supplementary material
Source: HighWire-hosted journal article supplement (https://ard.bmj.com/content/76/1/88)
Supplement: inline-supplementary-material-1 [file inline-supplementary-material-1.pdf]

## SUPPLEMENTARY APPENDIX

### Table of Contents—online supplement

|              |                                                                                                              |
|--------------|--------------------------------------------------------------------------------------------------------------|
| Pages 2-3:   | Study Investigators                                                                                          |
| Page 4:      | Supplementary Methods                                                                                        |
| Pages 5-6:   | <b>Figure S1.</b> Gatekeeping design for multiple comparisons                                                |
| Pages 7-8:   | <b>Figure S2.</b> Secondary efficacy analyses, Weeks 0-24                                                    |
| Pages 9-10:  | <b>Figure S3.</b> ACR components and ESR over time                                                           |
| Pages 11-12: | <b>Figure S4.</b> DAS28-ESR, CDAI, and SDAI over time                                                        |
| Pages 13-14: | <b>Figure S5.</b> ACR20, ACR50, and DAS28-CRP at Week 12 in subgroups defined by concomitant csDMARD therapy |
| Pages 15-16: | <b>Table S1.</b> Description of efficacy measures                                                            |
| Pages 17-18: | <b>Table S2.</b> Additional baseline characteristics and disease activity                                    |
| Pages 19:    | <b>Table S3.</b> Concomitant csDMARDs                                                                        |
| Pages 20:    | <b>Table S4.</b> ACR20, ACR50, ACR70 responses, Weeks 0-24                                                   |
| Pages 21-22: | <b>Table S5.</b> Adverse events during treatment, Weeks 0-24                                                 |
| Pages 23-25: | <b>Table S6.</b> Serious adverse events, Weeks 0-24                                                          |
| Pages 26-30: | <b>Table S7.</b> Laboratory summary, Weeks 0-12 and Weeks 0-24                                               |
| Pages 31-32: | <b>Table S8.</b> Protocol-defined serious adverse events, Weeks 0-24                                         |
| Pages 33-34: | <b>Table S9.</b> Follow-up emergent adverse events in the 28-day post-treatment evaluation period            |
| Pages 35:    | References                                                                                                   |

## Study Investigators

|                           |                                                                                                                                                                                                                                                                                                                       |
|---------------------------|-----------------------------------------------------------------------------------------------------------------------------------------------------------------------------------------------------------------------------------------------------------------------------------------------------------------------|
| <b>Argentina:</b>         | Julio Hofman, Benito Velasco, Eduardo Mysler, Juan Pablo, Rodolfo Pardo, Eleonora Lucero, Jose Maldonado Cocco, Liliana del Carmen Morales, Raul Ceitilin                                                                                                                                                             |
| <b>Australia:</b>         | Paul Bird, Stephen Hall, Anna Raj, Peter Youssef, Peter Nash                                                                                                                                                                                                                                                          |
| <b>Belgium:</b>           | Frank Raeman, Kurt de Vlam, Filip van den Bosch, Marc Leon, Piet Guesens                                                                                                                                                                                                                                              |
| <b>Canada:</b>            | Milton Baker, Andre Beaulieu, Andrew Chow, Rafat Faraawi, Clode Lessard, Timothy McCarthy, Stuart Seigel, Robert McKendry, Wojciech Olszynski, Arthur Bookman                                                                                                                                                         |
| <b>Croatia:</b>           | Dalibor Krpan, Visnja Prus, Marinko Artukovic                                                                                                                                                                                                                                                                         |
| <b>Czech Republic:</b>    | Eva Dokoupilova, Petr Jonas, Zdenek Dvorak, Vlastimil Racek                                                                                                                                                                                                                                                           |
| <b>Germany:</b>           | Jöm Kekow, Andrea Rubbert-Roth, Hans-Peter Tony                                                                                                                                                                                                                                                                       |
| <b>Hungary:</b>           | Edit Drescher, Tibor Balazs, Katalin Kerekes, Laszlo Hodinka                                                                                                                                                                                                                                                          |
| <b>India:</b>             | Jyotsana Oak, Chandrashekara Srikantiah, Vineeta Shobha, Reena Shamam, Alakendu Ghosh, Sarath Veravalli, Sarvajeet Pal, Rajiva Gupta, Sundeep Upadhyaya, D.C. Sundaresh, Surandra Kamath, Syamasis Bandyopadhyay, Jugal Kishore Kadel, Avinash Agarwal, Able Lawrence, Das Siddharth, Shailesh Udupudi, Piyush Parikh |
| <b>Italy:</b>             | Silvano Adami, Piercarlo Sarzi                                                                                                                                                                                                                                                                                        |
| <b>Japan:</b>             | Tatsuya Atsumi, Kazuhide Tanimura, Shigeru Honjo, Masato Okada, Wataru Hirose, Masahiro Iwamoto, Shunji Yoshida, Yoshinobu Koyama, Hiroaki Dobashi, Yuji Yamanishi                                                                                                                                                    |
| <b>Republic of Korea:</b> | Dae-Hyun Yoo, Chul-Soo Cho, Won Park, Shin Seok Lee                                                                                                                                                                                                                                                                   |
| <b>Mexico:</b>            | Fidencio Cons-Molina, Reyna Bustamante Gonzalez, Jamie Reyes Gonzaga, Guillermo Melendez                                                                                                                                                                                                                              |
| <b>Poland:</b>            | Slawomir Jeka, Marek Krogulec, Joanna Hilt, Barbara Bazela, Zenobia Czuszyńska                                                                                                                                                                                                                                        |
| <b>Portugal:</b>          | José Canas da Silva, José António Costa                                                                                                                                                                                                                                                                               |
| <b>Romania:</b>           | Simona Rednic, Eugenia Mociran, Maria Suta                                                                                                                                                                                                                                                                            |
| <b>Russia:</b>            | Marina Stanislav, Elena Ilivanova, Eygenya Shmidt, Olga Ershova, Irina Vinogradova                                                                                                                                                                                                                                    |

|                        |                                                                                                                                                                                                                                                                                                                                                                                                                                                                                                                                                                                                                                                                                                                                                                                                                                                                                                                                                                                                                                                                                                |
|------------------------|------------------------------------------------------------------------------------------------------------------------------------------------------------------------------------------------------------------------------------------------------------------------------------------------------------------------------------------------------------------------------------------------------------------------------------------------------------------------------------------------------------------------------------------------------------------------------------------------------------------------------------------------------------------------------------------------------------------------------------------------------------------------------------------------------------------------------------------------------------------------------------------------------------------------------------------------------------------------------------------------------------------------------------------------------------------------------------------------|
| <b>Slovakia:</b>       | Livia Bruszkova, Eva Ladicka, Roman Jancovic                                                                                                                                                                                                                                                                                                                                                                                                                                                                                                                                                                                                                                                                                                                                                                                                                                                                                                                                                                                                                                                   |
| <b>Spain:</b>          | Ricardo Blanco Alonso, Jose Carlos Rosas Gomez De Salaza, Eduardo Ucar, Jose Andres Roman Ivorra, Jaime Zubieta Tabemero                                                                                                                                                                                                                                                                                                                                                                                                                                                                                                                                                                                                                                                                                                                                                                                                                                                                                                                                                                       |
| <b>Taiwan:</b>         | Ko-Jen Li, Chang-Youh Tsai, Kun-Hung Chen, Chyou-Shen Lee, Chung-Ming Huang, Cheng-Chung Wei, Ying-Chou Chen, Hung-An Chen, Hsiang-Cheng Chen                                                                                                                                                                                                                                                                                                                                                                                                                                                                                                                                                                                                                                                                                                                                                                                                                                                                                                                                                  |
| <b>United Kingdom:</b> | Bruce Kirkham, David Walker, Hasan Tahir, Peter Prouse                                                                                                                                                                                                                                                                                                                                                                                                                                                                                                                                                                                                                                                                                                                                                                                                                                                                                                                                                                                                                                         |
| <b>United States:</b>  | Jeffrey Alper, Naga Bushan, Cong-Qiu Chu, Asif Cochinwala, John Condemi, John Budd, Hisham El-Kadi, Robert Ettlinger, Ira Fenton, Rose Fife, Roy Fleischmann, Pamela Freeman, Geoffrey Gladstein, Edward Goldberger, William Gough, Maria Greenwald, Robert Griffin, Kathryn Hobbs, Bruce Hoffman, Akgun Ince, Adrian Jaffer, Theresa Karplus, Joel Kremer, Roberto Leon-Perez, Roger Lidman, James Loveless, Gary Maniloff, Angela McCain, Kimberly McIlwain Smith, Kenneth Miller, Sathish Modugu, Monika Mohan, Paul Norwood, Richard Olson, Steven Overman, Carmen Pagan Duran, Jose Pando, Carlos Pantojas, Ashok Patel, Derek Peacock, Jeffrey Poiley, Jose Rodriguez Santiago, Richard Saini, Joy Schechtman, Joel Silverfield, Chokkalingam Siva, Nehad Soloman, Oscar Soto-Raices, Prashanth Sunkureddi, William Surbeck, Ramon Toro, Alvin Wells, Debra Weinstein, Anthony Sebba, Eric Lee, Abdelnaser Elkhilili, Charles Ludivico, Suthin Songcharoen, Timothy Swartz, Jeffrey Lisse, Wendy Lee, Eric Peters, Michael Stack, Farrukh Zaidi, George Kelly, Stuart Weisman, Isam Diab |

## Supplementary Methods

Patients were excluded from enrolment if they had any of the following abnormalities on screening laboratory tests:

- AST or ALT >1.5 times the ULN
- total bilirubin  $\geq$ 1.5 times the ULN
- neutropenia (absolute neutrophil count <1200 cells/uL)
- thrombocytopenia (platelets <100,000/uL)
- eGFR <40 mL/min/1.73m<sup>2</sup> (estimated using the MDRD equation)

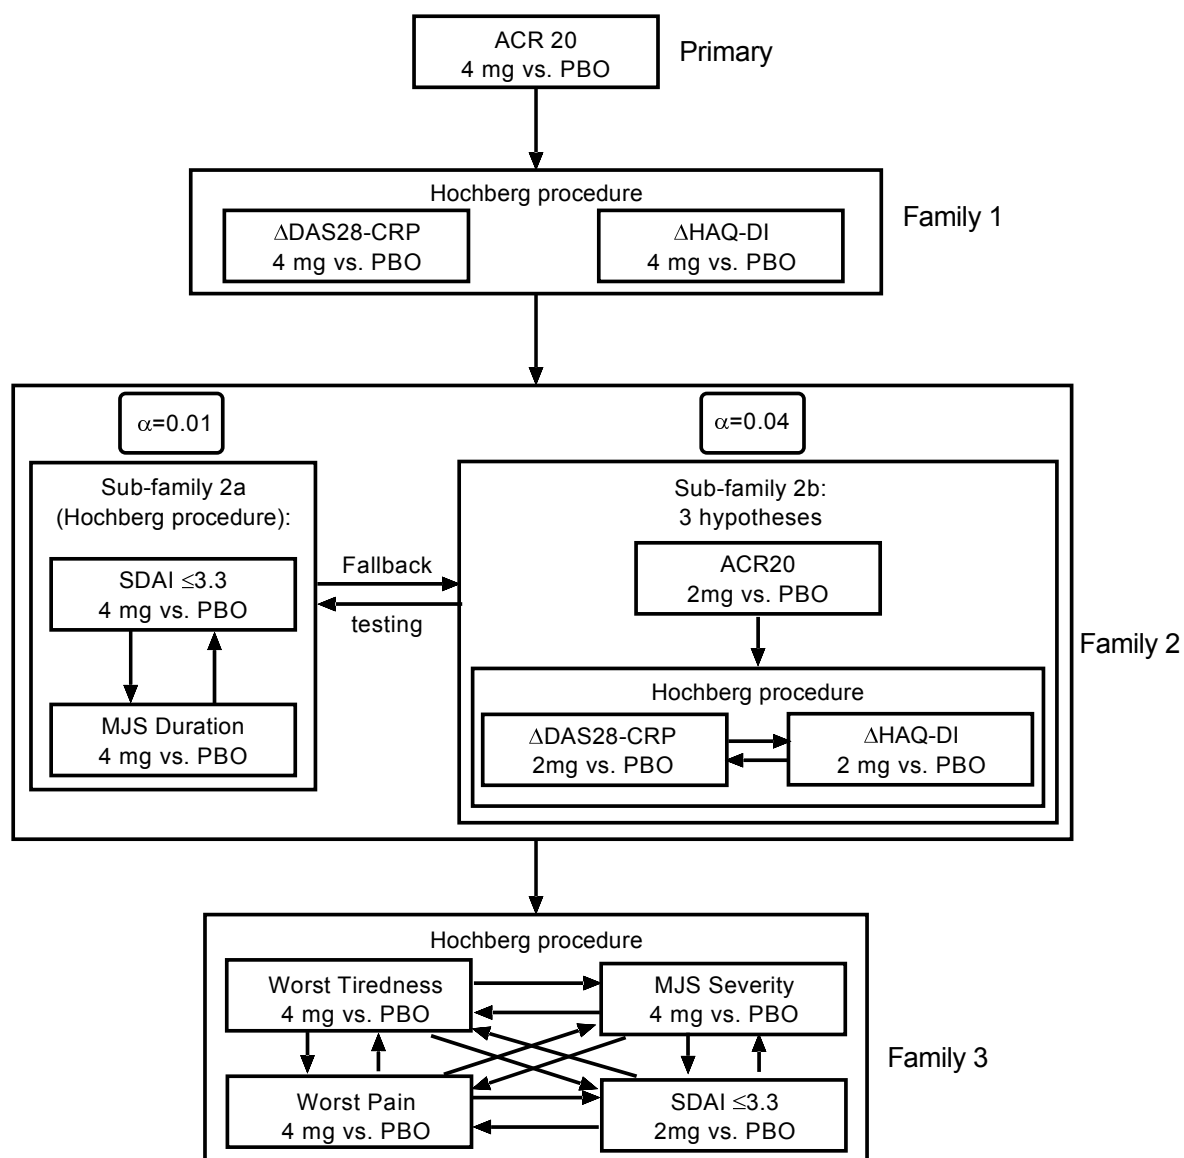

**Figure S1. Gatekeeping design**

The primary and secondary efficacy comparisons of baricitinib 4-mg versus placebo, or baricitinib 2-mg versus placebo, proceeded sequentially by families of endpoints. The primary efficacy endpoint compared the proportion of patients achieving ACR20 at Week 12 in baricitinib 4-mg versus placebo, followed by 3 families of secondary efficacy endpoints. Family 1 compared the changes from baseline in DAS28-CRP and in the HAQ-DI score at Week 12 (using a Hochberg testing procedure) between baricitinib 4-mg and placebo. Family 2 consisted

of 2 sub-families, one of which examined the proportion of patients achieving an SDAI score ( $\leq 3.3$ ) and the median duration of morning joint stiffness at Week 12 in the baricitinib 4-mg group versus placebo (using a Hochberg testing procedure), the other sub-family examined the percentage of patients achieving ACR20 at Week 12 in baricitinib 2-mg versus placebo, followed by the mean change from baseline at Week 12 in DAS28-CRP and in the HAQ-DI score (using a Hochberg testing procedure) between baricitinib 2-mg and placebo. Family 3 tested 4 hypotheses using a Hochberg testing procedure: the mean severity of morning joint stiffness (numeric rating scale [NRS]), mean worst tiredness (NRS), mean worst joint pain (NRS) in baricitinib 4-mg versus placebo; and the proportion of patients achieving an SDAI score ( $\leq 3.3$ ) in baricitinib 2-mg versus placebo at Week 12. The primary hypothesis and the 3 families of key secondary hypotheses were tested sequentially, such that testing proceeded to the next family only when all null hypotheses in a family were rejected. Within family 2,  $\alpha$ -levels of 0.01 and 0.04 were allocated to the 2 sub-families. If all null hypotheses in either sub-family were rejected, the corresponding initial  $\alpha$  was then propagated to the other sub-family using a fallback testing procedure. All endpoints had  $p \leq 0.001$ , except worst tiredness with  $p = 0.03$ ; thus all endpoints were declared to be statistically significant based on the gatekeeping strategy.

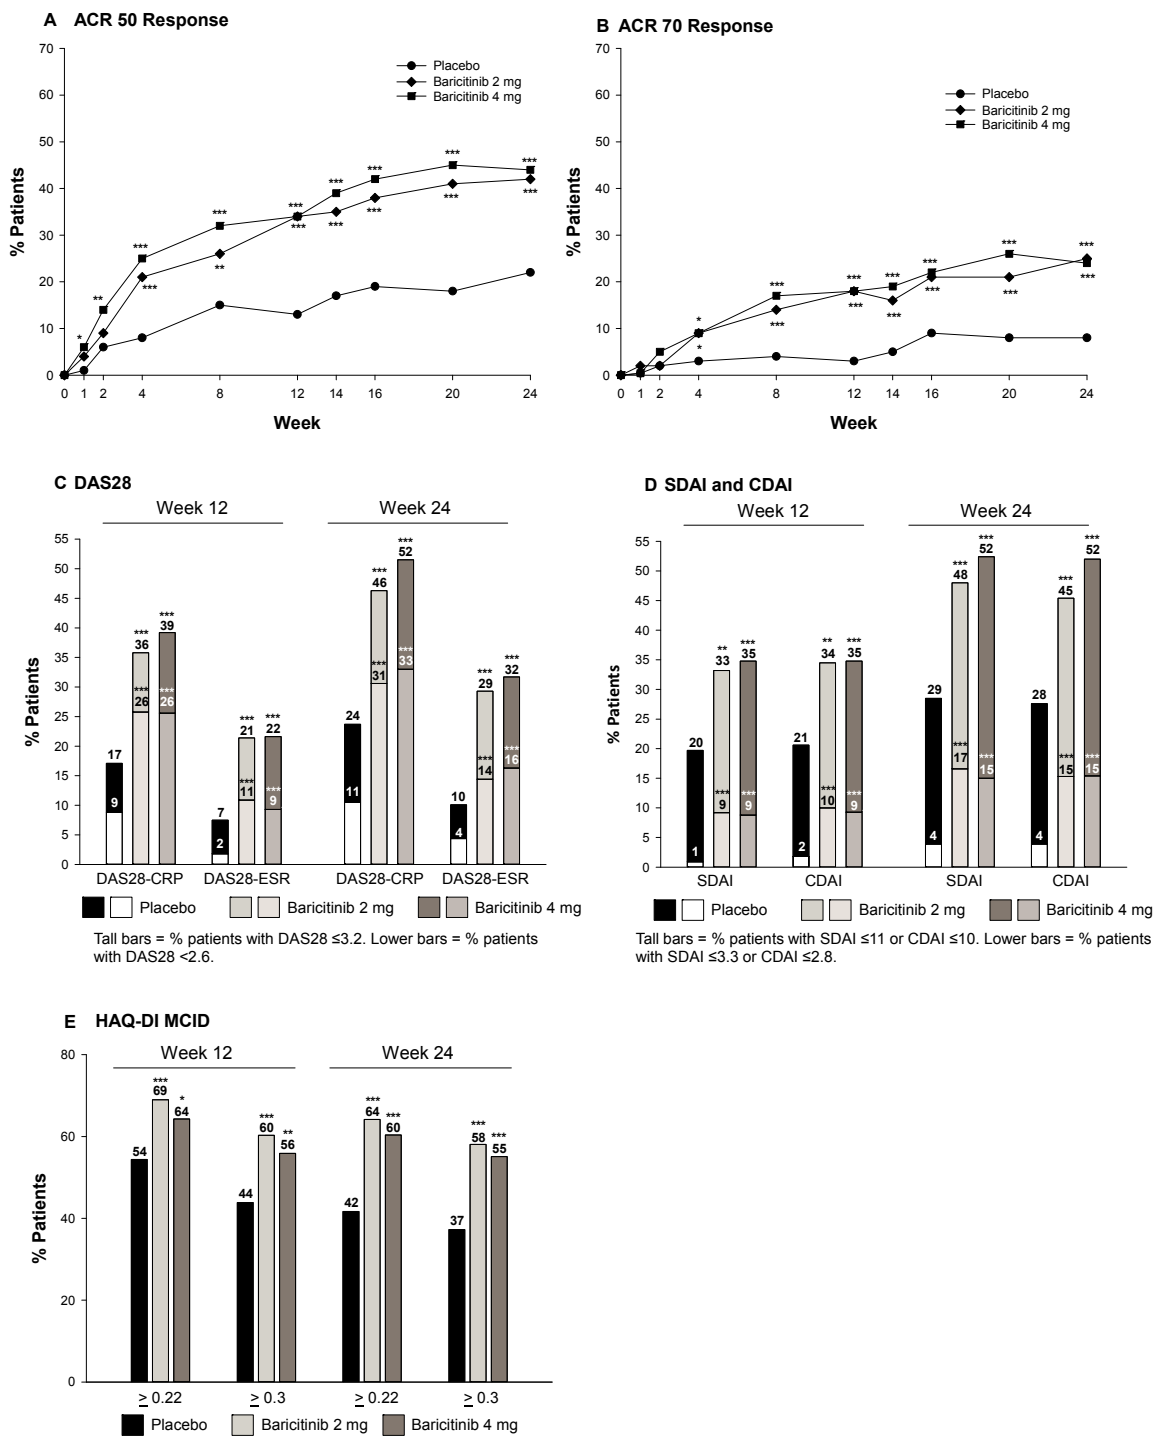

Figure S2. Secondary efficacy analyses, Week 0-24

Panels A and B show the percentage of patients achieving ACR50 (A) or ACR70 (B) over time through 24 weeks. Panel C shows the percentage of patients with DAS28-CRP and DAS28-ESR ( $<2.6$  or  $\leq 3.2$ ); Panel D shows SDAI ( $\leq 11$  or  $\leq 3.3$ ) and CDAI ( $\leq 10$  or  $\leq 2.8$ ); and Panel E shows the percentage of patients achieving a HAQ-DI score improvement ( $\geq 0.22$  or  $\geq 0.3$ ) at Weeks 12 and 24. \* $p \leq 0.05$ , \*\* $p \leq 0.01$ , \*\*\* $p \leq 0.001$  versus placebo using logistic regression without control for multiple comparisons.



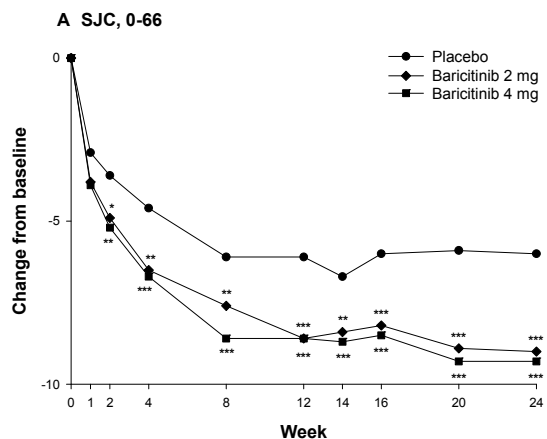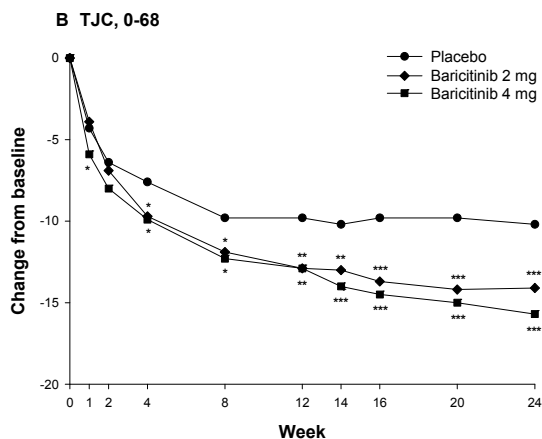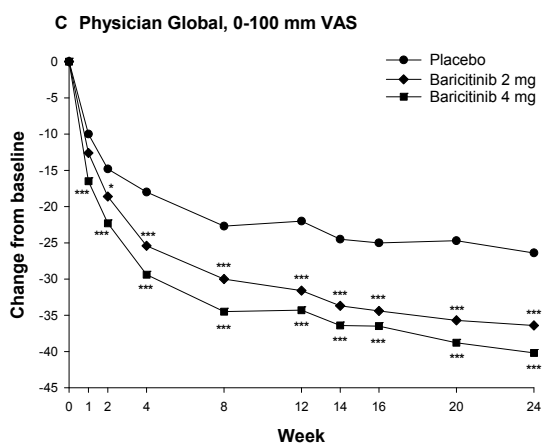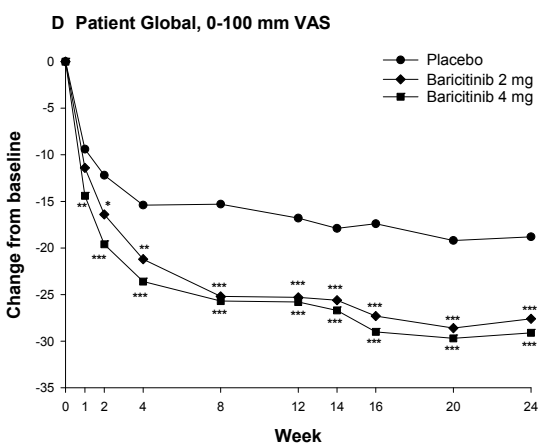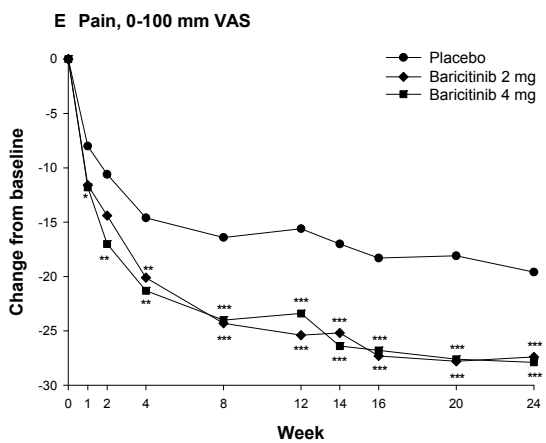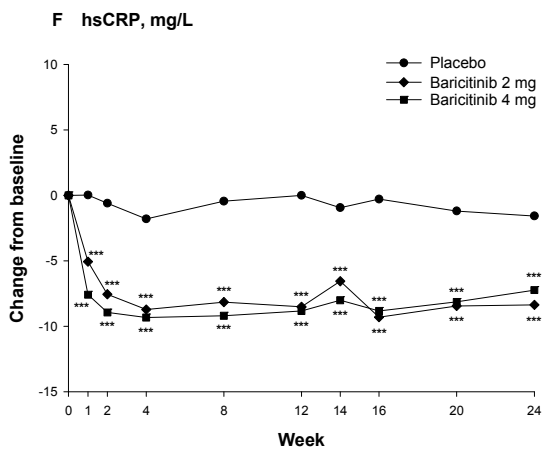

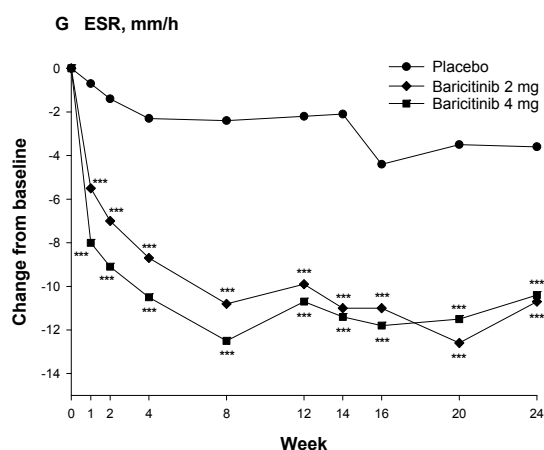

**Figure S3. ACR components and ESR change over time**

The least squares mean (LSM) change from baseline in ACR components and ESR, Weeks 0-24. Panels A and B: number of swollen joint counts (SJC) based on the 0-66 count and number of tender joints (TJC) based on the 0-68 count. Panels C, D, and E: Range, 0-100 mm on the visual analog scale (VAS); higher values indicate greater levels of physician-reported disease activity (Panel C), patient-reported disease activity (Panel D), and patient-reported pain (Panel E). Panels F and G: ULN = 3.0 mg/L for hsCRP (Panel F); higher values of hsCRP and ESR (Panel G) indicate greater levels of inflammation. The LSM change from baseline in the HAQ-DI is reported in Figure 2C in the manuscript. Data reported as modified last observation carried forward (mLOCF) for all measures. Similar to LOCF, mLOCF is modified to utilize the last observation prior to rescue or discontinuation. \* $p \leq 0.05$ , \*\* $p \leq 0.01$ , \*\*\* $p \leq 0.001$  versus placebo using ANCOVA without control for multiple comparisons.

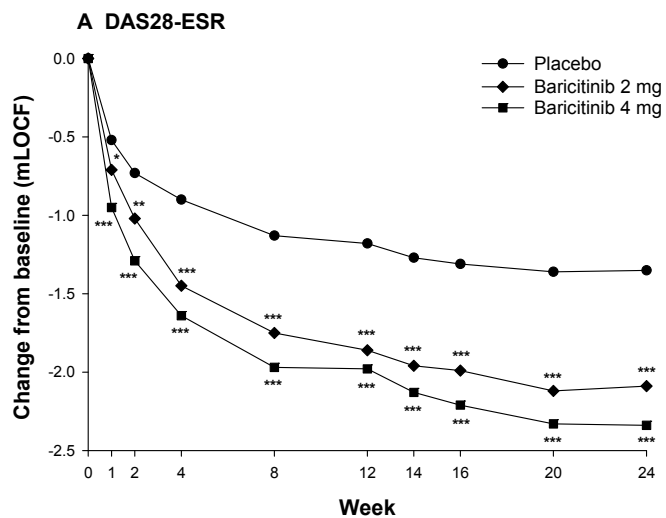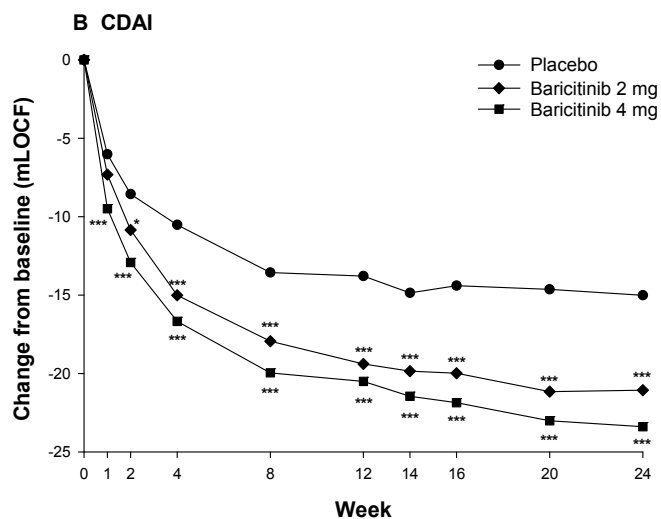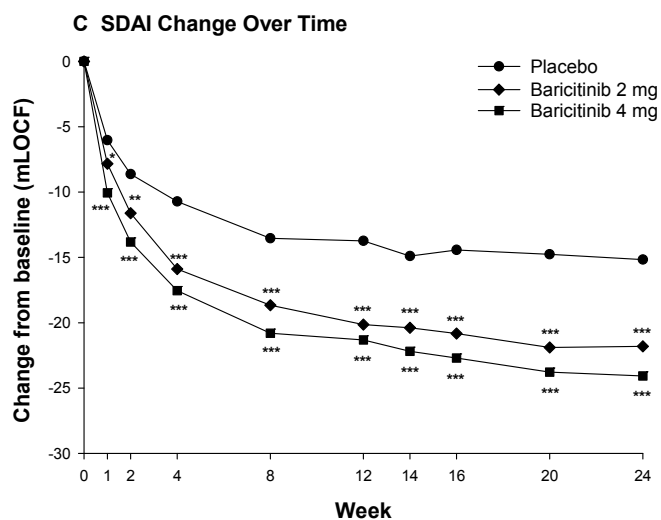

**Figure S4. DAS28-ESR, CDAI, and SDAI change over time**

The least squares mean (LSM) change from baseline in DAS28-ESR (Panel A), CDAI (Panel B), and SDAI (Panel C) from Weeks 0-24. \* $p \leq 0.05$ , \*\* $p \leq 0.01$ , \*\*\* $p \leq 0.001$  versus placebo using ANCOVA without control for multiple comparisons.

**A. ACR 20**

|                                    | n/N (%)     |                  |                  | Interaction p value |
|------------------------------------|-------------|------------------|------------------|---------------------|
|                                    | Placebo     | Baricitinib 2 mg | Baricitinib 4 mg |                     |
| <b>Week 12</b>                     |             |                  |                  |                     |
| <b>Overall population</b>          | 90/228 (39) | 151/229 (66)     |                  |                     |
|                                    | 90/228 (39) |                  | 140/227 (62)     |                     |
| <b>Background csDMARD category</b> |             |                  |                  |                     |
| None                               | 2/17 (12)   | 11/18 (61)       |                  |                     |
| MTX only                           | 45/109 (41) | 78/111 (70)      |                  |                     |
| Non-MTX csDMARDs                   | 17/44 (39)  | 26/41 (63)       |                  | 0.271               |
| MTX + other csDMARDs               | 26/58 (45)  | 36/59 (61)       |                  |                     |
| <hr/>                              |             |                  |                  |                     |
| None                               | 2/17 (12)   |                  | 7/13 (54)        |                     |
| MTX only                           | 45/109 (41) |                  | 72/114 (63)      |                     |
| Non-MTX csDMARDs                   | 17/44 (39)  |                  | 26/43 (60)       | 0.533               |
| MTX + other csDMARDs               | 26/58 (45)  |                  | 35/57 (61)       |                     |
| <hr/>                              |             |                  |                  |                     |
| <b>Week 24</b>                     |             |                  |                  |                     |
| <b>Overall population</b>          | 96/228 (42) | 140/229 (61)     |                  |                     |
|                                    | 96/228 (42) |                  | 148/227 (65)     |                     |
| <b>Background csDMARD category</b> |             |                  |                  |                     |
| None                               | 2/17 (12)   | 9/18 (50)        |                  |                     |
| MTX only                           | 48/109 (44) | 72/111(65)       |                  |                     |
| Non-MTX csDMARDs                   | 17/44 (39)  | 24/41 (59)       |                  | 0.367               |
| MTX + other csDMARDs               | 29/58 (50)  | 35/59 (59)       |                  |                     |
| <hr/>                              |             |                  |                  |                     |
| None                               | 2/17 (12)   |                  | 7/13 (54)        |                     |
| MTX only                           | 48/109 (44) |                  | 76/114 (67)      |                     |
| Non-MTX csDMARDs                   | 17/44 (39)  |                  | 23/43 (53)       | 0.498               |
| MTX + other csDMARDs               | 29/58 (50)  |                  | 42/57 (74)       |                     |

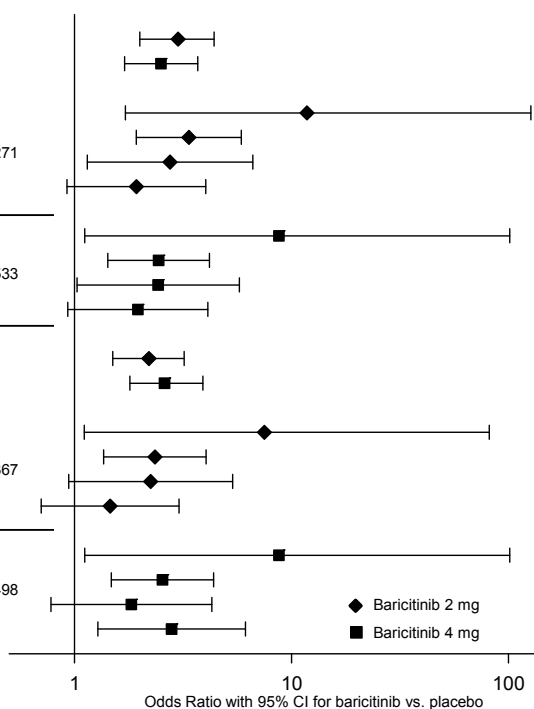

**B. ACR 50**

|                                    | n/N (%)     |                  |                  | Interaction p value |
|------------------------------------|-------------|------------------|------------------|---------------------|
|                                    | Placebo     | Baricitinib 2 mg | Baricitinib 4 mg |                     |
| <b>Week 12</b>                     |             |                  |                  |                     |
| <b>Overall population</b>          | 29/228 (13) | 77/229 (34)      |                  |                     |
|                                    | 29/228 (13) |                  | 76/227 (33)      |                     |
| <b>Background csDMARD category</b> |             |                  |                  |                     |
| None                               | 2/17 (12)   | 4/18 (22)        |                  |                     |
| MTX only                           | 14/109 (13) | 40/111 (36)      |                  |                     |
| Non-MTX csDMARDs                   | 7/44 (16)   | 18/41 (44)       |                  | 0.910               |
| MTX + other csDMARDs               | 6/58 (10)   | 15/59 (25)       |                  |                     |
| <hr/>                              |             |                  |                  |                     |
| None                               | 2/17 (12)   |                  | 2/13 (15)        |                     |
| MTX only                           | 14/109 (13) |                  | 42/114 (37)      |                     |
| Non-MTX csDMARDs                   | 7/44 (16)   |                  | 14/43 (33)       | 0.727               |
| MTX + other csDMARDs               | 6/58 (10)   |                  | 18/57 (32)       |                     |
| <hr/>                              |             |                  |                  |                     |
| <b>Week 24</b>                     |             |                  |                  |                     |
| <b>Overall population</b>          | 49/228 (21) | 95/229 (41)      |                  |                     |
|                                    | 49/228 (21) |                  | 100/227 (44)     |                     |
| <b>Background csDMARD category</b> |             |                  |                  |                     |
| None                               | 2/17 (12)   | 7/18 (39)        |                  |                     |
| MTX only                           | 22/109 (20) | 47/111 (42)      |                  |                     |
| Non-MTX csDMARDs                   | 10/44 (23)  | 15/41 (37)       |                  | 0.789               |
| MTX + other csDMARDs               | 15/58 (26)  | 26/59 (44)       |                  |                     |
| <hr/>                              |             |                  |                  |                     |
| None                               | 2/17 (12)   |                  | 5/13 (38)        |                     |
| MTX only                           | 22/109 (20) |                  | 48/114 (42)      |                     |
| Non-MTX csDMARDs                   | 10/44 (23)  |                  | 17/43 (40)       | 0.891               |
| MTX + other csDMARDs               | 15/58 (26)  |                  | 30/57 (53)       |                     |

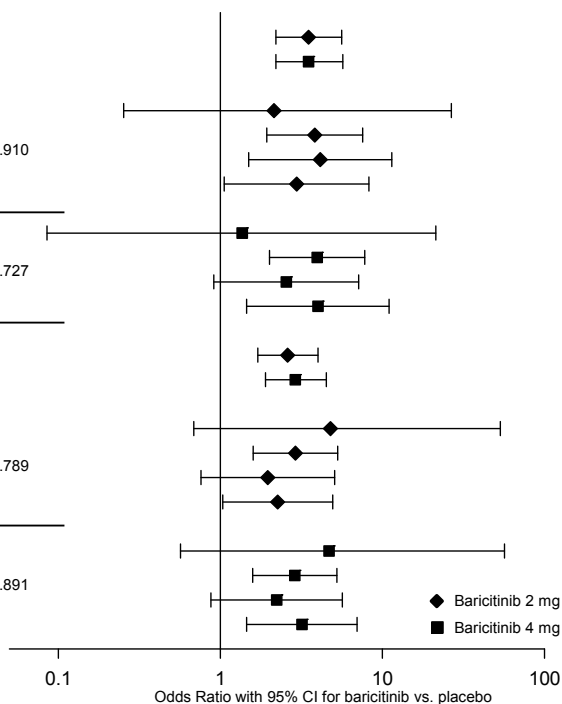

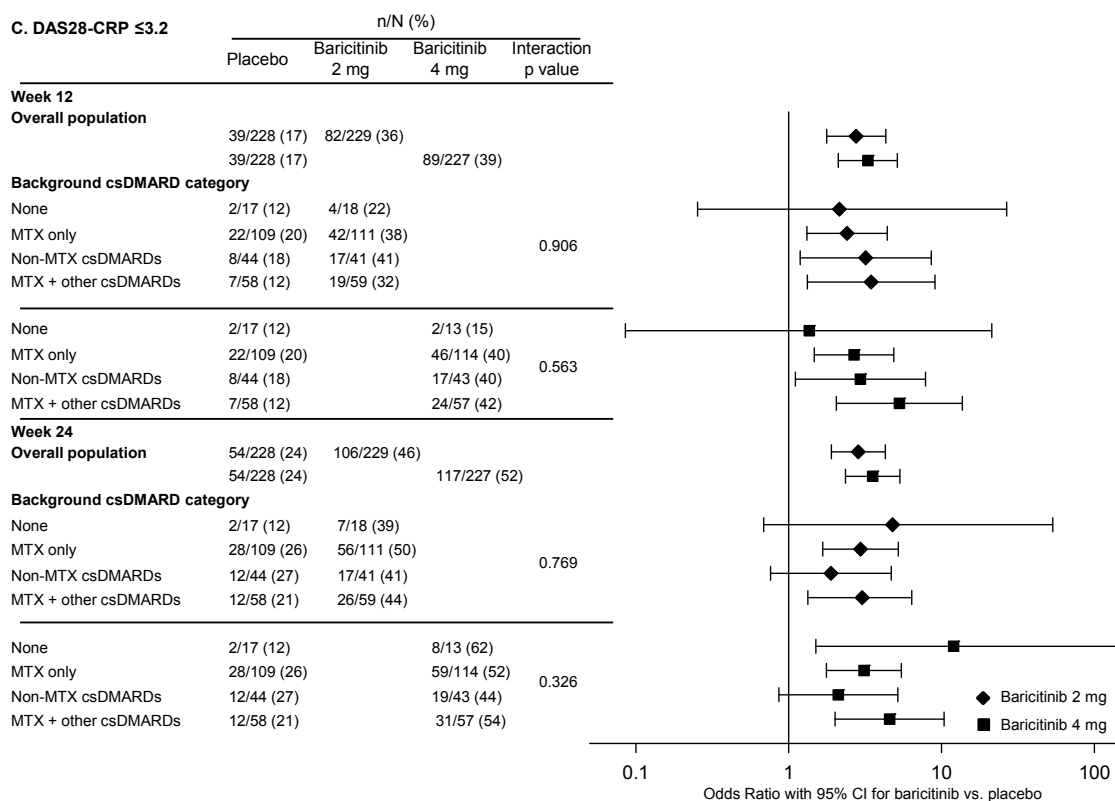

**Figure S5. ACR20, ACR50, and DAS28-CRP  $\leq 3.2$  in subgroups defined by concomitant csDMARD therapy**

Across the subgroups, the p-value is from the interaction test using a logistic regression model: treatment group + subgroup + treatment-by-subgroup while the odds ratio and 95% confidence interval (CI) are from the logistic regression model: treatment group. When logistic regression sample size requirements (<5 responders in any category for any subgroup) are not met, the simple odds ratio is calculated, with Fisher's exact test substituted for the p-value and 95% CI. For 13 of the 48 (27%) patients in the monotherapy subgroup, the only reported reason for discontinuation of prior csDMARDs was intolerance (AE). csDMARD, conventional synthetic disease-modifying antirheumatic drug; MTX, methotrexate; N, number of patients in the specified subgroup; n, number of patients in the specified category.

**Table S1. Description of efficacy measures**

| <b>Measure</b>            | <b>Definition</b>                                                                                                                                                                                                                                   | <b>Scale</b>                                                                                               | <b>Ref</b> |
|---------------------------|-----------------------------------------------------------------------------------------------------------------------------------------------------------------------------------------------------------------------------------------------------|------------------------------------------------------------------------------------------------------------|------------|
| ACR20,<br>ACR50,<br>ACR70 | A response based on $\geq 20\%$ , $\geq 50\%$ ,<br>$\geq 70\%$ improvement, respectively, in<br>tender and swollen joints and $\geq 20\%$ ,<br>$\geq 50\%$ , $\geq 70\%$ improvement,<br>respectively, in at least 3 of 5 ACR<br>core set measures: |                                                                                                            | 1          |
|                           | Pain                                                                                                                                                                                                                                                | Visual-analogue scale<br>ranging from 0 to 100 mm,<br>with higher values<br>representing more pain         |            |
|                           | Patient's global assessment                                                                                                                                                                                                                         | Visual-analogue scale<br>ranging from 0 to 100 mm,<br>with higher values indicating<br>more severe disease |            |
|                           | Physician's global assessment                                                                                                                                                                                                                       | Visual-analogue scale<br>ranging from 0 to 100 mm,<br>with higher values indicating<br>more severe disease |            |
|                           | Physical function                                                                                                                                                                                                                                   | HAQ-DI, in which scores<br>range from 0 to 3, with<br>higher scores indicating<br>greater disability       |            |

|                                     | Acute phase reactant (CRP or ESR)                                                                                       |                                                                                   |
|-------------------------------------|-------------------------------------------------------------------------------------------------------------------------|-----------------------------------------------------------------------------------|
| Clinical Disease Activity Index     | A score based on tender and swollen joints (28 count), patient global assessment, and physician global assessment       | 2,3                                                                               |
| DAS28-CRP, DAS28-ESR                | A score based on tender and swollen joints (28 count), patient global assessment, and acute phase reactant (CRP or ESR) | 4,5                                                                               |
| HAQ-DI                              | Health Assessment Questionnaire-Disability Index                                                                        | Scores range from 0 to 3, with higher scores indicating greater disability<br>6,7 |
| Simplified Disease Activity Index   | A score based on tender and swollen joints (28 count), patient global assessment, physician global assessment, and CRP  | 3,8                                                                               |
| Duration of Morning Joint Stiffness | Patients recorded the length of time (in minutes) that their morning joint stiffness lasted that day                    | N/A                                                                               |



|                                     |                                                                                                                                            |                                                                                                                                                                                                                         |
|-------------------------------------|--------------------------------------------------------------------------------------------------------------------------------------------|-------------------------------------------------------------------------------------------------------------------------------------------------------------------------------------------------------------------------|
| Severity of Morning Joint Stiffness | A value recorded daily by patients in electronic diaries based on the overall level of joint stiffness they had from the time they woke up | “Please rate the overall level of morning joint stiffness you had from the time you woke up today”; Numeric rating scale ranging from 0 to 10 with 0=no joint stiffness, 10=joint stiffness as bad as you can imagine   |
| Worst Joint Pain                    | A value recorded daily by patients in electronic diaries based on the worst level of joint pain experienced in the last 24 hours           | “Please rate your joint pain by selecting the one number that describes your joint pain at its WORST in the last 24 hours”; Numeric rating scale ranging from 0 to 10 with 0=no pain, 10=pain as bad as you can imagine |

|                    |                                                                                                                                 |                                                                                                                                                                                                                             |
|--------------------|---------------------------------------------------------------------------------------------------------------------------------|-----------------------------------------------------------------------------------------------------------------------------------------------------------------------------------------------------------------------------|
| Worst<br>Tiredness | A value recorded daily by patients in electronic diaries based on the worst level of tiredness experienced in the last 24 hours | “Please rate your tiredness by selecting the one number that describes your WORST level of tiredness during the past 24 hours”; Numeric rating scale ranging from 0 to 10 with 0=no tiredness, 10=as bad as you can imagine |
|--------------------|---------------------------------------------------------------------------------------------------------------------------------|-----------------------------------------------------------------------------------------------------------------------------------------------------------------------------------------------------------------------------|

---

**Table S2. Additional baseline characteristics and disease activity**

|                                              | <b>Placebo</b> | <b>Baricitinib<br/>2 mg QD</b> | <b>Baricitinib<br/>4 mg QD</b> |
|----------------------------------------------|----------------|--------------------------------|--------------------------------|
|                                              | <b>(N=228)</b> | <b>(N=229)</b>                 | <b>(N=227)</b>                 |
| <hr/>                                        |                |                                |                                |
| Region, n (%)                                |                |                                |                                |
| United States and Canada                     | 68 (30)        | 68 (30)                        | 68 (30)                        |
| Europe                                       | 61 (27)        | 61 (27)                        | 59 (26)                        |
| Central and South America, Mexico            | 28 (12)        | 29 (13)                        | 29 (13)                        |
| Asia                                         | 40 (18)        | 41 (18)                        | 39 (17)                        |
| Rest of World                                | 31 (14)        | 30 (13)                        | 32 (14)                        |
| Concomitant glucocorticoid use, n (%)        | 114 (50)       | 117 (51)                       | 115 (51)                       |
| Mean oral glucocorticoid dose,* mg/day       | 6 (3)          | 7 (3)                          | 6 (2)                          |
| Clinical Disease Activity Index <sup>†</sup> | 36 (12)        | 37 (13)                        | 36 (12)                        |
| Seronegative, n (%)                          | 42 (18)        | 44 (19)                        | 43 (19)                        |
| # of concomitant csDMARDs, n (%):            |                |                                |                                |
| None                                         | 17 (7)         | 18 (8)                         | 13 (6)                         |
| One                                          | 150 (66)       | 145 (63)                       | 151 (67)                       |
| MTX                                          | 109 (48)       | 111 (48)                       | 114 (50)                       |

|               |         |         |         |
|---------------|---------|---------|---------|
| Non-MTX       | 41 (18) | 34 (15) | 37 (16) |
| Two           | 55 (24) | 58 (25) | 57 (25) |
| MTX + non-MTX | 52 (23) | 51 (22) | 51 (22) |
| Two non-MTX   | 3 (1)   | 7 (3)   | 6 (3)   |
| ≥Three        | 6 (3)   | 8 (3)   | 6 (3)   |

---

csDMARD used in the “one, non-MTX” category included hydroxychloroquine (n= 47 [42%], leflunomide (n=46 [41%]), and sulfasalazine (n=13 [12%]).

csDMARDs, conventional synthetic disease-modifying antirheumatic drugs; MTX, methotrexate; N, number of patients randomized and treated; n, number of patients in the specified category; QD, once daily; SD, standard deviation.

\*≤10-mg per day of prednisone.

†Data reported as mean (SD).

**Table S3. Concomitant conventional synthetic DMARDs**

|                             |                | <b>Baricitinib</b> | <b>Baricitinib</b> |
|-----------------------------|----------------|--------------------|--------------------|
|                             | <b>Placebo</b> | <b>2 mg QD</b>     | <b>4 mg QD</b>     |
| <b>n (%)</b>                | <b>(N=228)</b> | <b>(N=229)</b>     | <b>(N=227)</b>     |
| MTX                         | 168 (74)       | 171 (75)           | 173 (76)           |
| Mean (SD) MTX dose, mg/week | 16 (5)         | 16 (5)             | 16 (5)             |
| Hydroxychloroquine          | 54 (24)        | 63 (28)            | 54 (24)            |
| Leflunomide                 | 28 (12)        | 21 (9)             | 29 (13)            |
| Sulfasalazine               | 23 (10)        | 28 (12)            | 22 (10)            |
| Chloroquine                 | 3 (1)          | 2 (<1)             | 3 (1)              |
| Azathioprine                | 1 (<1)         | 0                  | 3 (1)              |
| Bucillamine                 | 0              | 0                  | 1 (<1)             |
| Ciclosporin                 | 1 (<1)         | 0                  | 0                  |
| Minocycline                 | 1 (<1)         | 0                  | 0                  |
| Mizoribine                  | 0              | 0                  | 1 (<1)             |
| Tacrolimus                  | 1 (<1)         | 0                  | 0                  |

DMARDs, disease-modifying antirheumatic drugs; MTX, methotrexate; N, number of patients randomized and treated; n, number of patients in the specified category; QD, once-daily; SD, standard deviation.

Table S4. ACR20, ACR50, ACR70 responses Weeks 0-24†

| Weeks | ACR20   |                        |                        | ACR50   |                        |                        | ACR70   |                        |                        |
|-------|---------|------------------------|------------------------|---------|------------------------|------------------------|---------|------------------------|------------------------|
|       | Placebo | Baricitinib<br>2 mg QD | Baricitinib<br>4 mg QD | Placebo | Baricitinib<br>2 mg QD | Baricitinib<br>4 mg QD | Placebo | Baricitinib<br>2 mg QD | Baricitinib<br>4 mg QD |
|       | (N=228) | (N=229)                | (N=227)                | (N=228) | (N=229)                | (N=227)                | (N=228) | (N=229)                | (N=227)                |
| 1     | 32 (14) | 53 (23)*               | 69 (30)***             | 3 (1)   | 10 (4)                 | 13 (6)*                | 1 (<1)  | 4 (2)                  | 1 (<1)                 |
| 2     | 54 (24) | 79 (34)*               | 99 (44)***             | 14 (6)  | 20 (9)                 | 32 (14)**              | 4 (2)   | 4 (2)                  | 11 (5)                 |
| 4     | 66 (29) | 119 (52)***            | 122 (54)***            | 17 (7)  | 48 (21)***             | 57 (25)***             | 7 (3)   | 21 (9)*                | 20 (9)*                |
| 8     | 92 (40) | 132 (58)***            | 133 (59)***            | 33 (14) | 60 (26)**              | 73 (32)***             | 9 (4)   | 32 (14)***             | 38 (17)***             |
| 12    | 90 (39) | 151 (66)***            | 140 (62)***            | 29 (13) | 77 (34)***             | 76 (33)***             | 7 (3)   | 41 (18)***             | 41 (18)***             |
| 14    | 97 (43) | 145 (63)***            | 139 (61)***            | 39 (17) | 79 (34)***             | 88 (39)***             | 12 (5)  | 37 (16)***             | 42 (19)***             |
| 16    | 98 (43) | 145 (63)***            | 148 (65)***            | 43 (19) | 86 (38)***             | 96 (42)***             | 20 (9)  | 47 (21)***             | 49 (22)***             |
| 20    | 92 (40) | 147 (64)***            | 146 (64)***            | 40 (18) | 93 (41)***             | 102 (45)***            | 18 (8)  | 49 (21)***             | 58 (26)***             |

24      96 (42)      140 (61)\*\*\*      148 (65)\*\*\*      49 (21)      95 (41)\*\*\*      100 (44)\*\*\*      18 (8)      58 (25)\*\*\*      55 (24)\*\*\*

ACR = American College of Rheumatology; N, number of patients randomized and treated; n, number of patients in the specified category; NRI, nonresponder imputation; QD, once-daily.

†Data (NRI) presented as n (%) patients.

\* $p \leq 0.05$ , \*\* $p \leq 0.01$ , and \*\*\* $p \leq 0.001$  versus placebo using logistic regression model.

**Table S5. Adverse events during treatment, Weeks 0-24**

| <b>MedDRA Preferred Term, n (%)*</b>                                             | <b>Placebo<br/>(N=228)</b> | <b>Baricitinib<br/>2 mg QD<br/>(N=229)</b> | <b>Baricitinib<br/>4 mg QD<br/>(N=227)</b> |
|----------------------------------------------------------------------------------|----------------------------|--------------------------------------------|--------------------------------------------|
| Patients with $\geq 1$ adverse event during treatment                            | 161 (71)                   | 154 (67)                                   | 162 (71)                                   |
| Preferred terms reported in $\geq 2\%$ patients in either baricitinib dose group |                            |                                            |                                            |
| Upper respiratory tract infection                                                | 18 (8)                     | 14 (6)                                     | 24 (11)                                    |
| Nasopharyngitis                                                                  | 18 (8)                     | 10 (4)                                     | 18 (8)                                     |
| Blood CPK increased                                                              | 0                          | 8 (3)                                      | 15 (7)                                     |
| Cough                                                                            | 3 (1)                      | 9 (4)                                      | 9 (4)                                      |
| Gastroenteritis                                                                  | 1 (<1)                     | 5 (2)                                      | 9 (4)                                      |
| Headache                                                                         | 8 (4)                      | 15 (7)                                     | 9 (4)                                      |
| Hypercholesterolemia                                                             | 2 (<1)                     | 5 (2)                                      | 9 (4)                                      |
| Oropharyngeal pain                                                               | 2 (<1)                     | 4 (2)                                      | 9 (4)                                      |
| Urinary tract infection                                                          | 5 (2)                      | 12 (5)                                     | 9 (4)                                      |
| Pharyngitis                                                                      | 3 (1)                      | 6 (3)                                      | 8 (4)                                      |
| Bronchitis                                                                       | 12 (5)                     | 6 (3)                                      | 7 (3)                                      |
| Dizziness                                                                        | 4 (2)                      | 3 (1)                                      | 7 (3)                                      |



|                                   |        |        |       |
|-----------------------------------|--------|--------|-------|
| Alopecia                          | 4 (2)  | 1 (<1) | 6 (3) |
| Arthralgia                        | 3 (1)  | 6 (3)  | 6 (3) |
| AST increased                     | 1 (<1) | 3 (1)  | 6 (3) |
| Dyspepsia                         | 2 (<1) | 1 (<1) | 6 (3) |
| Hyperlipidemia                    | 2 (<1) | 2 (<1) | 6 (3) |
| Hypertension                      | 2 (<1) | 10 (4) | 6 (3) |
| ALT increased                     | 2 (<1) | 5 (2)  | 5 (2) |
| Back pain                         | 11 (5) | 9 (4)  | 5 (2) |
| Constipation                      | 3 (1)  | 7 (3)  | 5 (2) |
| Fatigue                           | 5 (2)  | 2 (<1) | 5 (2) |
| Nausea                            | 8 (4)  | 7 (3)  | 5 (2) |
| Pyrexia                           | 2 (<1) | 1 (<1) | 5 (2) |
| Abdominal pain upper              | 1 (<1) | 5 (2)  | 4 (2) |
| Anemia                            | 7 (3)  | 6 (3)  | 4 (2) |
| Diarrhea                          | 10 (4) | 10 (4) | 4 (2) |
| Dyspnea                           | 0      | 0      | 4 (2) |
| Lower respiratory tract infection | 1 (<1) | 1 (<1) | 4 (2) |
| Sinus congestion                  | 0      | 0      | 4 (2) |

|                      |       |       |                    |
|----------------------|-------|-------|--------------------|
| Sinusitis            | 6 (3) | 3 (1) | 4 (2)              |
| Vomiting             | 4 (2) | 7 (3) | 4 (2)              |
| Abdominal pain       | 0     | 5 (2) | 3 (1)              |
| Herpes zoster        | 0     | 4 (2) | 3 (1)              |
| Mouth ulceration     | 0     | 5 (2) | 3 (1)              |
| Erectile dysfunction | 0     | 0     | 1 (3) <sup>†</sup> |

---

ALT, alanine transaminase; AST, aspartate transaminase; CPK, creatine phosphokinase; MedDRA, *Medical Dictionary for Regulatory Activities*; N, number of patients randomized and treated; n, number of patients in the specified category; QD, once daily; TEAE, treatment-emergent adverse event.

\*Data represent n (%) patients who experienced a TEAE at any time during the treatment period, up to the time of rescue.

<sup>†</sup>Denominator adjusted because event is specific to males.

**Table S6. Serious Adverse Events Weeks 0-24\***

|                                                  | <b>Placebo<br/>(N=228)</b>                                    | <b>Baricitinib<br/>2 mg QD<br/>(N=229)</b> | <b>Baricitinib<br/>4 mg QD<br/>(N=227)</b> |
|--------------------------------------------------|---------------------------------------------------------------|--------------------------------------------|--------------------------------------------|
| <b>MedDRA System<br/>Organ Class<sup>†</sup></b> | <b>Preferred Term</b>                                         |                                            |                                            |
| Blood and lymphatic<br>system disorders          | n=1                                                           | n=0                                        | n=0                                        |
|                                                  | Anemia                                                        |                                            |                                            |
| Cardiac disorders                                | n=2                                                           | n=1                                        | n=1                                        |
|                                                  | Myocardial infarction;<br>ventricular<br>tachycardia          | Atrial fibrillation                        | Angina pectoris                            |
| Gastrointestinal<br>disorders                    | n=1                                                           | n=0                                        | n=1                                        |
|                                                  | Diverticulum<br>intestinal;<br>gastrointestinal<br>hemorrhage |                                            | Dyspepsia                                  |
| Hepatobiliary                                    | n=0                                                           | n=0                                        | n=1                                        |

disorders

Cholecystitis acute

|                                                 |                                                                                 |                            |                                                                                                                       |
|-------------------------------------------------|---------------------------------------------------------------------------------|----------------------------|-----------------------------------------------------------------------------------------------------------------------|
| Infections and infestations                     | n=4                                                                             | n=2                        | n=4                                                                                                                   |
|                                                 | Pneumonia; bronchitis; urinary tract infection; wound infection; staphylococcal | Pneumonia; gastroenteritis | Bacterial infection; disseminated tuberculosis; lower respiratory tract infection; pneumonia; sepsis; viral infection |
| Injury, poisoning, and procedural complications | n=2                                                                             | n=0                        | n=2                                                                                                                   |
|                                                 | Fall (2 patients); patella fracture; upper limb fracture                        |                            | Animal bite; tibia fracture                                                                                           |
| Musculoskeletal and connective tissue disorders | n=2                                                                             | n=0                        | n=2                                                                                                                   |
|                                                 | Back pain; synovial cyst                                                        |                            | Muscular weakness; myalgia; myositis; spinal pain                                                                     |

|                                                 |                               |                                                                |                                                                                      |
|-------------------------------------------------|-------------------------------|----------------------------------------------------------------|--------------------------------------------------------------------------------------|
| Nervous system disorders                        | n=1                           | n=1                                                            | n=0                                                                                  |
|                                                 | Subarachnoid hemorrhage       | Migraine                                                       |                                                                                      |
| Psychiatric disorders                           | n=1                           | n=1                                                            | n=0                                                                                  |
|                                                 | Depression; suicidal ideation | Post-traumatic stress disorder                                 |                                                                                      |
| Renal and urinary disorders                     | n=1                           | n=0                                                            | n=0                                                                                  |
|                                                 | Renal failure                 |                                                                |                                                                                      |
| Respiratory, thoracic and mediastinal disorders | n=0                           | n=1                                                            | n=4                                                                                  |
|                                                 |                               | Acute respiratory distress syndrome; acute respiratory failure | Allergic bronchitis; interstitial lung disease; pleural effusion; pulmonary embolism |
| Skin and subcutaneous tissue disorders          | n=1                           | n=1                                                            | n=1                                                                                  |

Subcutaneous  
emphysema

Psoriasis

Rash pruritic

AE, adverse event; CPK, creatine phosphokinase; MedDRA, *Medical Dictionary for Regulatory Activities*; N, number of patients randomized and treated; n, number of patients in the specified category; QD, once-daily; SAE, serious adverse event.

\*SAEs reported using conventional International Conference on Harmonization definitions up to the time of rescue. Table does not describe events that were serious for the reason of protocol definition. The protocol required that AEs or laboratory abnormalities leading to permanent discontinuation of study drug be designated as serious adverse events.

†Events are listed according to the system organ classes and preferred terms in MedDRA version 17.0.

**Table S7. Laboratory summary Week 0–Week 12 and Week 0–Week 24**

|                                                                        | Weeks 0-12         |                    |                    | Weeks 0-24         |                    |                    |
|------------------------------------------------------------------------|--------------------|--------------------|--------------------|--------------------|--------------------|--------------------|
|                                                                        |                    | Baricitinib        | Baricitinib        |                    | Baricitinib        | Baricitinib        |
|                                                                        | Placebo<br>(N=228) | 2 mg QD<br>(N=229) | 4 mg QD<br>(N=227) | Placebo<br>(N=228) | 2 mg QD<br>(N=229) | 4 mg QD<br>(N=227) |
| Treatment exposure—no. of patient-yr                                   | 50.4               | 52.3               | 51.0               | 89.8               | 97.7               | 96.4               |
| <b>Hemoglobin<sup>†</sup></b>                                          |                    |                    |                    |                    |                    |                    |
| Low n/n at risk <sup>†</sup> (%)                                       | 30/165<br>(18)     | 40/154<br>(26)     | 36/169<br>(21)     | 44/165<br>(27)     | 48/154<br>(31)     | 57/169<br>(34)     |
| Grade 1: ≥6.2 mmol/L to <7.1 mmol/L for females, <7.8 mmol/L for males | 36 (16)            | 37 (16)            | 41 (18)            | 45 (20)            | 41 (18)            | 58 (26)            |
| Grade 2: ≥4.9 to <6.2 mmol/L                                           | 7 (3)              | 6 (3)              | 13 (6)             | 10 (4)             | 15 (7)             | 17 (8)             |
| Grade 3: ≥4.0 to <4.9 mmol/L                                           | 0                  | 1 (<1)             | 0                  | 0                  | 1 (<1)             | 0                  |
| Grade 4: <4.0 mmol/L                                                   | 0                  | 0                  | 0                  | 0                  | 0                  | 0                  |

**Neutrophils<sup>†</sup>**

|                                                           |                   |                |                 |              |               |                |
|-----------------------------------------------------------|-------------------|----------------|-----------------|--------------|---------------|----------------|
| Low n/n at risk <sup>†</sup> (%)                          | 2/221<br>( $<1$ ) | 11/227*<br>(5) | 15/221**<br>(7) | 8/221<br>(4) | 18/227<br>(8) | 19/221*<br>(9) |
| Grade 1: $\geq 1500$ to<br>$< 2000$ cells/mm <sup>3</sup> | 3 (1)             | 5 (2)          | 14 (6)          | 8 (4)        | 10 (4)        | 15 (7)         |
| Grade 2: $\geq 1000$ to<br>$< 1500$ cells/mm <sup>3</sup> | 1 ( $<1$ )        | 6 (3)          | 1 ( $<1$ )      | 2 ( $<1$ )   | 9 (4)         | 4 (2)          |
| Grade 3: $\geq 500$ to<br>$< 1000$ cells/mm <sup>3</sup>  | 0                 | 1 ( $<1$ )     | 1 ( $<1$ )      | 1 ( $<1$ )   | 1 ( $<1$ )    | 1 ( $<1$ )     |

**Lymphocytes<sup>†</sup>**

|                                                          |                |               |               |                |                |                |
|----------------------------------------------------------|----------------|---------------|---------------|----------------|----------------|----------------|
| Low n/n at risk <sup>†</sup> (%)                         | 25/213<br>(12) | 15/216<br>(7) | 17/208<br>(8) | 28/213<br>(13) | 22/216<br>(10) | 23/208<br>(11) |
| Grade 1: $\geq 800$ to<br>$< 1100$ cells/mm <sup>3</sup> | 17 (8)         | 10 (4)        | 21 (9)        | 23 (10)        | 19 (8)         | 32 (14)        |
| Grade 2: $\geq 500$ to<br>$< 800$ cells/mm <sup>3</sup>  | 16 (7)         | 7 (3)         | 10 (4)        | 18 (8)         | 13 (6)         | 16 (7)         |
| Grade 3: $\geq 200$ to<br>$< 500$ cells/mm <sup>3</sup>  | 2 ( $<1$ )     | 2 ( $<1$ )    | 2 ( $<1$ )    | 2 ( $<1$ )     | 3 (1)          | 2 ( $<1$ )     |

**Platelets**

|                                                      |            |       |            |            |       |       |
|------------------------------------------------------|------------|-------|------------|------------|-------|-------|
| Platelet count<br>$> 600,000$ cells/mm <sup>3‡</sup> | 1 ( $<1$ ) | 4 (2) | 2 ( $<1$ ) | 2 ( $<1$ ) | 5 (2) | 5 (2) |
|------------------------------------------------------|------------|-------|------------|------------|-------|-------|



**ALT<sup>†</sup>**

|                                     |               |                |                |                |                |                |
|-------------------------------------|---------------|----------------|----------------|----------------|----------------|----------------|
| High n/n at risk <sup>†</sup> (%)   | 14/193<br>(7) | 20/202<br>(10) | 40/208<br>(19) | 24/193<br>(12) | 35/202<br>(17) | 59/208<br>(28) |
| Grade 1: > ULN<br>and ≤ 2.5x ULN    | 14 (6)        | 17 (7)         | 39 (17)        | 24 (11)        | 30 (13)        | 56 (25)        |
| Grade 2: > 2.5x ULN<br>and ≤ 5x ULN | 2 (<1)        | 5 (2)          | 2 (<1)         | 2 (<1)         | 8 (3)          | 3 (1)          |
| Grade 3: > 5x ULN<br>and ≤ 20x ULN  | 0             | 2 (<1)         | 0              | 0              | 2 (<1)         | 1 (<1)         |

**Creatinine<sup>†</sup>**

|                                     |              |              |              |              |              |              |
|-------------------------------------|--------------|--------------|--------------|--------------|--------------|--------------|
| High n/n at risk <sup>†</sup> (%)   | 5/221<br>(2) | 3/224<br>(1) | 6/218<br>(3) | 7/221<br>(3) | 5/224<br>(2) | 7/218<br>(3) |
| Grade 1: > ULN and<br>≤ 1.5x ULN    | 5 (2)        | 3 (1)        | 4 (2)        | 7 (3)        | 5 (2)        | 4 (2)        |
| Grade 2: > 1.5x ULN<br>and ≤ 3x ULN | 1 (<1)       | 0            | 0            | 1 (<1)       | 0            | 1 (<1)       |
| Grade 3: > 3x ULN<br>and ≤ 6x ULN   | 0            | 0            | 2 (<1)       | 0            | 0            | 2 (<1)       |

**CPK<sup>†</sup>**

|                                   |               |                 |                   |               |                   |                   |
|-----------------------------------|---------------|-----------------|-------------------|---------------|-------------------|-------------------|
| High n/n at risk <sup>†</sup> (%) | 13/203<br>(6) | 31/215*<br>(14) | 58/206***<br>(28) | 18/203<br>(9) | 53/215***<br>(25) | 78/206***<br>(38) |
| Grade 1: > ULN and<br>≤ 2.5x ULN  | 12 (5)        | 29 (13)         | 51 (23)           | 17 (8)        | 48 (21)           | 68 (30)           |

|                                               |                |                |                |                |                  |                  |
|-----------------------------------------------|----------------|----------------|----------------|----------------|------------------|------------------|
| Grade 2: > 2.5x ULN<br>and ≤ 5x ULN           | 1 (<1)         | 4 (2)          | 9 (4)          | 1 (<1)         | 8 (3)            | 13 (6)           |
| Grade 3: > 5x ULN<br>and ≤ 10x ULN            | 1 (<1)         | 0              | 3 (1)          | 1 (<1)         | 1 (<1)           | 3 (1)            |
| Grade 4: > 10x ULN                            | 0              | 0              | 1 (<1)         | 0              | 0                | 2 (<1)           |
| <b>LDL Cholesterol<sup>§</sup></b>            |                |                |                |                |                  |                  |
| High n/n at risk <sup>†</sup> (%)             | 18/132<br>(14) | 32/156<br>(21) | 30/134<br>(22) | 22/132<br>(17) | 49/158**<br>(31) | 41/136**<br>(30) |
| Near optimal: ≥2.59<br>and <3.36 mmol/L       | 17 (9)         | 20 (9)         | 22 (11)        | 20 (10)        | 25 (12)          | 26 (12)          |
| Borderline high:<br>≥3.36 and <4.14<br>mmol/L | 13 (7)         | 27 (13)        | 29 (14)        | 16 (8)         | 36 (17)          | 34 (16)          |
| High: ≥4.14 and<br><4.91 mmol/L               | 11 (6)         | 17 (8)         | 13 (6)         | 15 (7)         | 25 (12)          | 28 (13)          |
| Very high: ≥4.91<br>mmol/L                    | 4 (2)          | 4 (2)          | 8 (4)          | 4 (2)          | 8 (4)            | 8 (4)            |
| <b>HDL Cholesterol<sup>§</sup></b>            |                |                |                |                |                  |                  |
| Low n/n at risk <sup>†</sup> (%)              | 9/185<br>(5)   | 5/194<br>(3)   | 5/185<br>(3)   | 12/187<br>(6)  | 10/196<br>(5)    | 7/187<br>(4)     |
| Normal: ≥1.03 and<br><1.55 mmol/L             | 16 (8)         | 5 (2)          | 4 (2)          | 24 (12)        | 13 (6)           | 8 (4)            |
| Low: <1.03 mmol/L                             | 9 (5)          | 5 (2)          | 5 (2)          | 12 (6)         | 10 (5)           | 7 (3)            |

ALT, alanine transaminase; CPK, creatine phosphokinase; CTCAE, Common Terminology  
Criteria for Adverse Events, version 3.0; HDL, high-density lipoprotein; LDL, low-density

lipoprotein; N, number of patients randomized and treated; NCEP, National Cholesterol Education Program; QD, once-daily; ULN, upper limit of normal.

†Data represent n (%) patients and indicate the worst CTCAE grade in patients who experienced a treatment-emergent increase in grade at any time during the treatment period, up to the time of rescue.

§Data represent n (%) patients and indicate the worst NCEP category in patients who experienced a treatment-emergent worsening in category at any time during the treatment period, up to the time of rescue.

†n = number of patients with the specified abnormality in indicated direction; n at risk = number of patients at risk for the abnormality in each treatment group. Percentages are based on the number of patients at risk for the specific abnormality in each treatment group.

‡Incidence of protocol-defined thrombocytosis in patients with platelet counts >600,000 cells/mm<sup>3</sup>, excluding patients with a baseline value of >600,000 cells/mm<sup>3</sup>.

\*p≤0.05, \*\*p≤0.01, and \*\*\*p≤0.001 versus placebo by Fisher's exact test.

**Table S8. Protocol-defined serious adverse events Weeks 0-24**

| MedDRA Preferred Term, n                   | Baricitinib        |                    |                    |
|--------------------------------------------|--------------------|--------------------|--------------------|
|                                            | Placebo<br>(N=228) | 2 mg QD<br>(N=229) | 4 mg QD<br>(N=227) |
| Protocol-Defined serious adverse events, n |                    |                    |                    |
| (%)*                                       | 5 (2)              | 9 (4)              | 8 (4)              |
| Anemia                                     | 0                  | 1 (<1)             | 0                  |
| Non-cardiac chest pain                     | 0                  | 1 (<1)             | 0                  |
| Edema peripheral                           | 0                  | 1 (<1)             | 0                  |
| Hepatic steatosis                          | 0                  | 1 (<1)             | 0                  |
| Hypersensitivity                           | 0                  | 0                  | 1 (<1)             |
| Herpes zoster                              | 0                  | 4 (2)              | 3 (1)              |
| Urinary tract infection                    | 0                  | 0                  | 1 (<1)             |
| Exposure during pregnancy <sup>†</sup>     | 1 (<1)             | 0                  | 0                  |
| Blood triglycerides increased              | 0                  | 0                  | 1 (<1)             |
| Lymphocyte count decreased                 | 0                  | 0                  | 1 (<1)             |
| Alanine aminotransferase increased         | 0                  | 1 (<1)             | 0                  |
| Glomerular filtration rate decreased       | 0                  | 1 (<1)             | 0                  |

|                         |        |   |        |
|-------------------------|--------|---|--------|
| Myopathy                | 1 (<1) | 0 | 0      |
| Depression              | 1 (<1) | 0 | 0      |
| Irritability            | 1 (<1) | 0 | 0      |
| Mood altered            | 1 (<1) | 0 | 0      |
| Amenorrhea <sup>†</sup> | 0      | 0 | 1 (<1) |
| Lung cyst               | 1 (<1) | 0 | 0      |

MedDRA, *Medical Dictionary for Regulatory Activities*; N, number of patients randomized and treated; n, number of patients in the specified category; QD, once-daily; SAEs, serious adverse events.

\*Data represent n (%) patients who experienced a protocol-defined SAE at any time during the treatment period, up to the time of rescue. Table describes SAEs serious for the reason of protocol definition. The protocol required that AEs or laboratory abnormalities leading to permanent discontinuation of study drug be designated as SAEs.

<sup>†</sup>Denominator adjusted because event is specific to females.

**Table S9. Follow-up emergent adverse events in the 28-day post-treatment evaluation period**

|                                                      | <b>Placebo</b>       | <b>All Baricitinib</b> |
|------------------------------------------------------|----------------------|------------------------|
| <b>System Organ Class</b>                            | <b>(Not rescued)</b> | <b>Exposures*</b>      |
| <b>MedDRA Preferred Term</b>                         | <b>(N=17)</b>        | <b>(N=41)</b>          |
| Patients with ≥1 event                               | 2 (12)               | 4 (10)                 |
| Cardiac disorders                                    | 0                    | 1 (2)                  |
| Sinus bradycardia                                    | 0                    | 1 (2)                  |
| Gastrointestinal disorders                           | 1 (6)                | 2 (5)                  |
| Gastritis                                            | 0                    | 1 (2)                  |
| Lip disorder                                         | 0                    | 1 (2)                  |
| Diarrhea                                             | 1 (6)                | 0                      |
| General disorders and administration site conditions | 1 (6)                | 0                      |
| Pyrexia                                              | 1 (6)                | 0                      |
| Infections and infestations                          | 1 (6)                | 0                      |
| Appendicitis                                         | 1 (6)                | 0                      |
| Pelvic abscess                                       | 1 (6)                | 0                      |
| Rash pustular                                        | 1 (6)                | 0                      |

|                                                 |       |       |
|-------------------------------------------------|-------|-------|
| Investigations                                  | 1 (6) | 0     |
| Blood creatine phosphokinase increased          | 1 (6) | 0     |
| Musculoskeletal and connective tissue disorders | 1 (6) | 0     |
| Polymyositis                                    | 1 (6) | 0     |
| Reproductive system and breast disorders        | 1 (6) | 0     |
| Vulvovaginal pruritus <sup>†</sup>              | 1 (9) | 0     |
| Respiratory, thoracic and mediastinal disorders | 0     | 2 (5) |
| Cough                                           | 0     | 1 (2) |
| Dyspnea                                         | 0     | 1 (2) |
| Pulmonary embolism                              | 0     | 1 (2) |
| Skin and subcutaneous tissue disorders          | 1 (6) | 0     |
| Dermatitis bullous                              | 1 (6) | 0     |

---

MedDRA, *Medical Dictionary for Regulatory Activities*; N, number of patients in each cohort; n = number of patients in the specified category.

Data reported as n (%)

\*All baricitinib exposures include rescued patients in the placebo group as well as rescued and nonrescued patients in the baricitinib 2 mg and 4 mg groups.

<sup>†</sup>Denominator adjusted because event is specific to females.

### Supplementary References

1. Felson DT, Anderson JJ, Boers M, et al. American College of Rheumatology. Preliminary definition of improvement in rheumatoid arthritis. *Arthritis Rheum.* 1995;38:727–35.
2. Aletaha D, Nell VP, Stamm T, et al. Acute phase reactants add little to composite disease activity indices for rheumatoid arthritis: validation of a clinical activity score. *Arthritis Res Ther.* 2005;7:R796–806.
3. Aletaha D, Smolen J. The Simplified Disease Activity Index (SDAI) and the Clinical Disease Activity Index (CDAI): a review of their usefulness and validity in rheumatoid arthritis. *Clin Exp Rheumatol.* 2005;23(39 Suppl):S100–8.
4. Disease Activity Score in rheumatoid arthritis. Nijmegen, the Netherlands: University Medical Center. <http://www.das-score.nl/das28/> (accessed 04/28/2016).
5. Prevoo ML, van 't Hof MA, Kuper HH, et al. Modified disease activity scores that include twenty-eight-joint counts. Development and validation in a prospective longitudinal study of patients with rheumatoid arthritis. *Arthritis Rheum.* 1995;38(1):44–8.
6. Fries JF, Spitz P, Kraines RG, et al. Measurement of patient outcome in arthritis. *Arthritis Rheum.* 1980;23:137–45.
7. Fries JF, Spitz PW, Young DY. The dimensions of health outcomes: the health assessment questionnaire, disability and pain scales. *J Rheum.* 1982;9:789–93.
8. Smolen JS, Breedveld FC, Schiff MH, et al. A simplified disease activity index for rheumatoid arthritis for use in clinical practice. *Rheumatology.* 2003;42:244–57.
